# Supplementary material
Source: HighWire-hosted journal article supplement (http://ajnr-stage2.highwire.org/highwire/filestream/183320/field_highwire_adjunct_files/0/0071.pdf)
Supplement: 0071.pdf [file 0071.pdf]

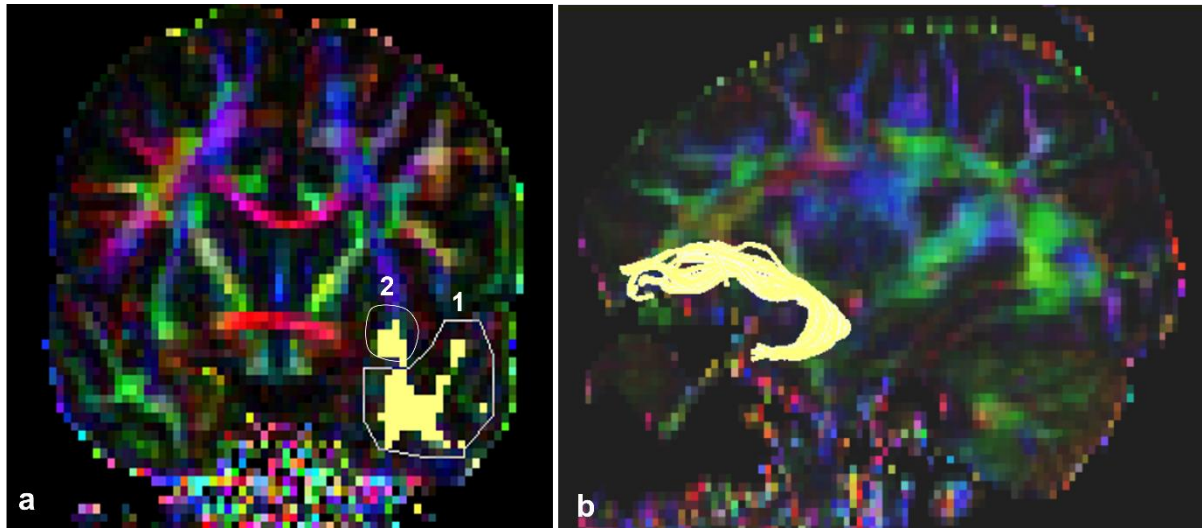

Online Supplemental Data: Illustration of Diffusion Tensor Tractography of the uncinatus fasciculus (UF) a) FA color map shows that the two regions of interest (ROI) are drawn at the most posterior coronal section where the frontal and temporal lobes are separated. The first ROI (1) includes the entire temporal lobe, while the second ROI (2) includes the entire projections toward the frontal lobe [30]. b) 3D sagittal view of the left UF on FA color map reveals its trajectory which starts in the temporal pole, passes through the insula and ends in the frontal lobe.
